# Supplementary material
Source: PubMed Central journal article supplement (PMC6436456)
Supplement: AJSLP-27-1303-s006.pdf [file AJSLP-27-1303-s006.pdf]

**Supplemental Material S6.** Western Aphasia Battery (WAB) subtests and Part II subtests.

| ID | Visit # | WAB AQ (/100) | Info. Content (/10) | Fluency (/10) | Spont. Speech (/20) | AV Comp. (/10) | Rep. (/10) | Naming (/10) | Animal Fluency (/20) | Reading Comp. (/40) | Reading Comm. (/20) | Writing (/34) | Reading Irregular Words (/10) | Reading Non-words (/10) | Writing Irregular Words (/10) | Writing Words (/10) |
|----|---------|---------------|---------------------|---------------|---------------------|----------------|------------|--------------|----------------------|---------------------|---------------------|---------------|-------------------------------|-------------------------|-------------------------------|---------------------|
| 1  | 1       | 94.6          | 9                   | 9             | 18                  | 10             | 9.6        | 9.7          | 17                   | 40                  | 20                  | 33            | 10                            | 9                       | 10                            |                     |
| 1  | 2       | 84            | 9                   | 5             | 14                  | 10             | 8.8        | 9.2          | 13                   | 40                  | 20                  | 30            | 10                            | DNT                     | 10                            |                     |
| 1  | 3       | CND           | 9                   | 5             | 14                  | 10             | CND        | 9.1          | 11                   | 40                  | 20                  | DNT           | 10                            | DNT                     | 9                             |                     |
| 1  | 4       | 74.6          | 9                   | 4             | 13                  | 10             | 6          | 8.3          | 10                   | 24                  | DNT                 | 28.5          | DNT                           | DNT                     | 7                             |                     |
| 1  | 5       | CND           | 7                   | 5             | 12                  | 9.95           | CND        | 7.2          | CND                  | 26                  | 6                   | 14.5          | NA                            | DNT                     | 3                             |                     |
| 1  | 6       | CND           | DNT                 | DNT           | DNT                 | 9.3            | DNT        | DNT          | DNT                  | 12                  | DNT                 | DNT           | DNT                           | DNT                     | 0                             |                     |
| 2  | 1       | 98.7          | 10                  | 10            | 20                  | 9.95           | 9.8        | 9.6          | 16                   | 40                  | 20                  | 34            | 10                            | 9                       | 10                            |                     |
| 2  | 2       | 96.4          | 10                  | 9             | 19                  | 10             | 9.8        | 9.4          | 14                   | 40                  | 20                  | 30            | 10                            | 8                       | 10                            |                     |
| 2  | 3       | 96            | 10                  | 9             | 19                  | 9.8            | 10         | 9.2          | 12                   | 40                  | 19                  | 32            | 10                            | 9                       | 9                             |                     |
| 2  | 4       | 95.4          | 10                  | 9             | 19                  | 10             | 9.8        | 8.9          | 9                    | 40                  | 20                  | 24            | 10                            | 6                       | 9                             |                     |
| 2  | 5       | 85.6          | 9                   | 5             | 14                  | 9.9            | 9.3        | 9.6          | 6                    | 40                  | 20                  | 32            | 10                            | 8                       | 8                             |                     |
| 2  | 6       | CND           | 8                   | 4             | 12                  | 10             | DNT        | 60           | DNT                  | 40                  | DNT                 | 13            | DNT                           | DNT                     | 6                             |                     |
| 3  | 1       | 100           | 10                  | 10            | 20                  | 10             | 10         | 10.0         | 20                   | 40                  | 20                  | 34            | 10                            | 8                       | 7                             |                     |
| 3  | 2       | 96.6          | 10                  | 9             | 19                  | 10             | 9.8        | 9.5          | 15                   | 40                  | 20                  | 33.5          | 10                            | 9                       | 7                             |                     |
| 3  | 3       | 96.6          | 10                  | 9             | 19                  | 10             | 9.8        | 9.5          | 15                   | 40                  | 20                  | 34            | 10                            | 10                      | 10                            |                     |
| 3  | 4       | 97            | 10                  | 10            | 20                  | 10             | 9.6        | 8.9          | 12                   | 32                  | 20                  | 33.5          | DNT                           | DNT                     | 8                             |                     |
| 3  | 5       | CND           | 10                  | CND           | CND                 | 9.95           | CND        | 8.7          | 7                    | 32                  | 10                  | 32.5          | DNT                           | DNT                     | 9                             |                     |
| 3  | 6       | CND           | 8                   | 5             | 13                  | 9.85           | CND        | CND          | DNT                  | 32                  | 9                   | 11.5          | DNT                           | DNT                     | 8                             |                     |
| 4  | 1       | 97.4          | 10                  | 9             | 19                  | 10             | 9.7        | 10.0         | 20                   | 40                  | 20                  | 34            | 10                            | 10                      | 10                            |                     |
| 4  | 2       | 96            | 10                  | 9             | 19                  | 10             | 9          | 10.0         | 20                   | 40                  | 20                  | 34            | 10                            | 10                      | 10                            |                     |
| 4  | 3       | 87.6          | 10                  | 6             | 14                  | 9.9            | 8.6        | 9.3          | 14                   | 34                  | 20                  | 31            | 9                             | 9                       | 10                            |                     |
| 4  | 4       | 79.9          | 9                   | 6             | 15                  | 9.35           | 6.2        | 9.4          | 14                   | 34                  | 20                  | 30            | 10                            | 7                       | 10                            |                     |
| 4  | 5       | CND           | 8                   | 4             | 12                  | 7.8            | CND        | 8.3          | 10                   | 20                  | 7                   | 18            | DNT                           | DNT                     | 7                             |                     |

*Note.* Maximum score noted in each column header. AQ = Aphasia Quotient; Info. = Information; Spont. = Spontaneous; AV Comp. = Auditory Verbal Comprehension; Rep. = Repetition; Comp. = Comprehension; Comm. = Commands; CND = could not determine, although test was attempted\*; DNT = not test.

\* If patients were unable to complete any portion of the WAB testing, whether that was secondary to motoric limitations or, more often, fatigue, a WAB could not be calculated. For the Apraxia of Speech Rating Scale and articulation error score, this indicates a patient did not produce enough speech to validly and reliably score these measures.
